# Supplementary material
Source: publisher figshare collection journal article supplement (https://acs.figshare.com/ndownloader/files/4756522)
Supplement: Supplementary file 1 [file 4756522]

## Methanolysis as a Route to Gallium(III) Clusters: Synthesis and Structural Characterization of a Decanuclear Molecular Wheel

Giannis S. Papaefstathiou,<sup>†</sup> Anastasia Manessi,<sup>†</sup> Catherine P. Raptopoulou,<sup>‡</sup> Aris Terzis,<sup>‡</sup> and Theodoros F. Zafiropoulos<sup>\*,†</sup>

<sup>†</sup> Department of Chemistry, University of Patras, Patras GR 265 04, Greece.

<sup>‡</sup> Institute of Materials Science, NCSR “Demokritos”, GR 153 10 Aghia Paraskevi Attikis, Greece.

**Synthesis of  $[\text{Ga}(\text{OMe})_2\{\text{O}_2\text{CC}(\text{OH})\text{Ph}_2\}]_{10}\cdot 2\text{MeOH}\cdot 0.5\text{H}_2\text{O}$ .** Solid  $\text{Ga}(\text{NO}_3)_3\cdot 9\text{H}_2\text{O}$  (0.17 g, 0.4 mmol) was dissolved under stirring in a clear solution of  $\text{LiOH}\cdot \text{H}_2\text{O}$  (0.042 g, 1.0 mmol) and benzoic acid (0.092 g, 0.4 mmol) in MeOH (10 mL). The clear colorless solution was closed and left undisturbed at room temperature for a period of a week, during which time colorless crystals of X-ray quality formed. The crystals were collected by vacuum filtration, washed with MeOH ( $5 \times 5$  mL) and dried under vacuum over  $\text{CaCl}_2$ . Yield: 0.09 g, ca. 60 %. Anal. Calcd for  $\text{C}_{160}\text{H}_{171}\text{O}_{50.5}\text{Ga}_{10}$   $\{[\text{Ga}(\text{OMe})_2\{\text{O}_2\text{CC}(\text{OH})\text{Ph}_2\}]_{10}\cdot 0.5\text{H}_2\text{O}\}$ : C, 53.39; H, 4.79. Found: C, 53.50; H 4.65.

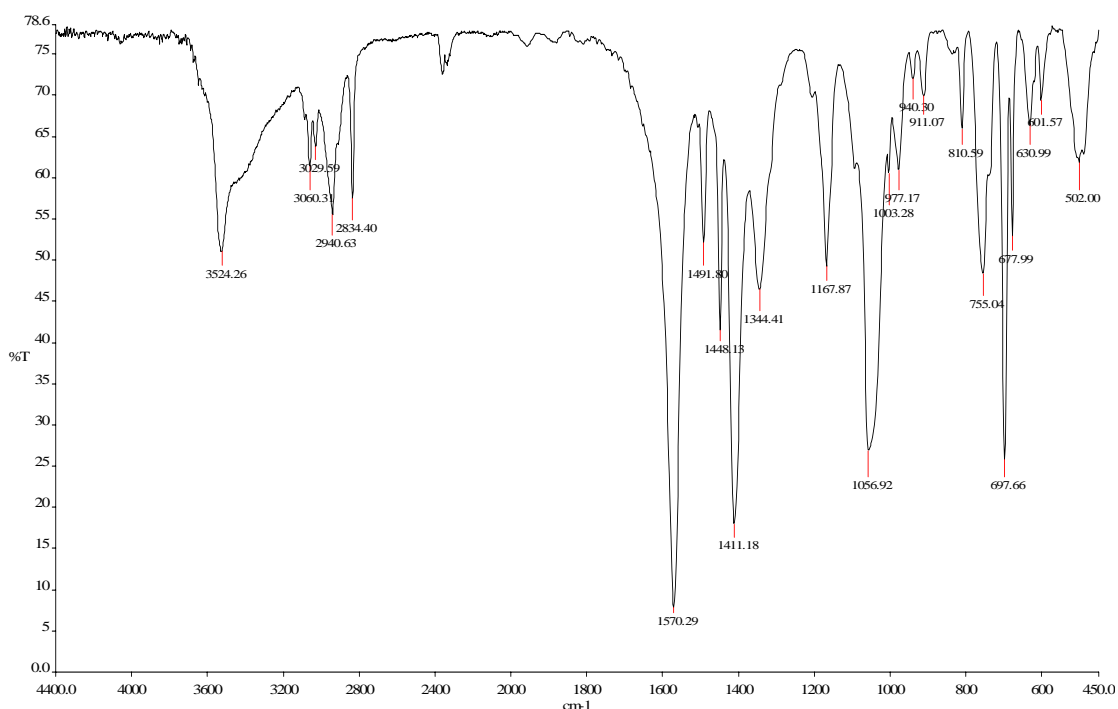

**Figure S1.** The IR spectrum of  $[\text{Ga}(\text{OMe})_2\{\text{O}_2\text{CC}(\text{OH})\text{Ph}_2\}]_{10}\cdot 2\text{MeOH}\cdot 0.5\text{H}_2\text{O}$  (KBr pellet) in the  $450 - 4400\text{ cm}^{-1}$ .

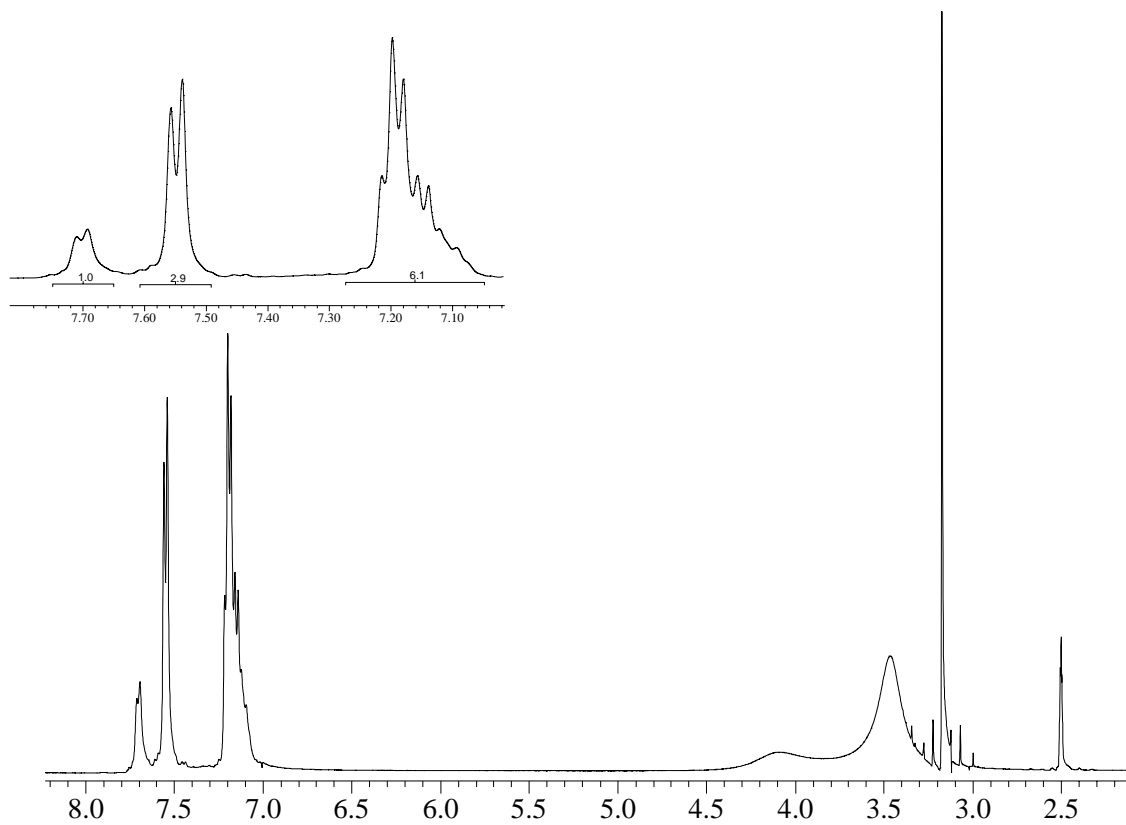

**Figure S2.** The  $^1\text{H}$  NMR spectrum of  $[\text{Ga}(\text{OMe})_2\{\text{O}_2\text{CC}(\text{OH})\text{Ph}_2\}]_{10} \cdot 2\text{MeOH} \cdot 0.5\text{H}_2\text{O}$  in  $\text{DMSO}-d_6$ .
